# Supplementary material
Source: publisher figshare collection journal article supplement (https://geolsoc.figshare.com/ndownloader/files/5426546)
Supplement: Supplementary file 1 [file 5426546]

Table 1.
Sample	Fraction	Weight	U	Cm-Pb	Ratios									Ages (Ma)
		(µg)	(ppm)	(ppm) ‡
					206Pb/204Pb †	207Pb/206Pb*	2?%	206Pb/238U*	2?%	207Pb/235U*	2?%	Rho		207Pb/206Pb	2? abs	206Pb/238U	2? abs	207Pb/235U	2? abs
JNL86 - Lorn	Z1	1	328	4.5	210.87	0.0555	0.24	0.06907	0.18	0.52849	0.31	0.66		432.3	0.4	430.5	0.8	430.8	1.3
	Z2	4.1	243	1.6	895.18	0.05552	0.14	0.06824	0.19	0.52011	0.24	0.81		433	3.1	425.4	0.8	426.8	1
	Z5	7.6	90	3.3	482.95	0.05503	0.14	0.06895	0.17	0.52759	0.22	0.78		413.6	3.1	429.6	0.7	427.1	0.9
	Z6	4.5	163	4.9	408.31	0.05541	0.14	0.06805	0.19	0.51921	0.24	0.81		428.8	3.2	424.5	0.8	425.1	1
JNL88 -	Z5	1.1	1095	0.8	1463.03	0.05519	0.06	0.06769	0.17	0.51516	0.18	0.94		420	1.3	422.2	0.7	421.9	0.8
Rannoch Moor	Z6	3.2	635	0.7	2468.14	0.0552	0.06	0.06781	0.16	0.51609	0.17	0.93		420	1.4	422.9	0.7	422.5	0.7
	Z8	0.6	1820	1	946.35	0.05517	0.06	0.06776	0.16	0.5154	0.17	0.93		419.1	1.4	422.6	0.7	422.1	0.7
	Z9	0.3	885	3.1	647.62	0.0552	0.06	0.06778	0.16	0.51589	0.18	0.91		420.3	1.2	422.8	0.7	422.4	0.7
JNGC76 -	Z1	1.7	125	2.5	91.41	0.05503	7.81	0.06618	0.53	0.50219	7.82	0.31		413.6	1.8	413.1	2.1	413.2	26.9
Glencoe Fault Intrusion	Z2	1.6	149	8.7	1639.34	0.05517	0.86	0.06636	0.14	0.50481	0.92	0.48		419.2	19.2	414.2	0.6	415	3.1
	Z3	2.1	962	12.5	900.9	0.05502	1.08	0.0666	0.16	0.50523	1.14	0.42		413.1	24	415.6	0.7	415.2	3.9
	Z4	9.4	193	6.9	1732.79	0.05515	1.06	0.06608	0.13	0.50224	1.14	0.6		418.2	23.7	412.5	0.5	413.4	3.9
	Z5	1.1	290	10.5	1661.72	0.05514	0.68	0.06686	0.12	0.50833	0.73	0.45		417.9	15.2	417.2	0.5	417.3	2.5
	Z6	3.9	307	3.3	6587.27	0.05516	1.52	0.06672	0.16	0.50741	1.62	0.69		418.6	33.5	416.4	0.7	416.7	5.5
	Z7	1.1	437	0.3	6582.16	0.05514	0.09	0.06648	0.21	0.50547	0.23	0.93		418	1.9	414.9	0.9	415.4	1
	Z8	1.1	373	8.1	232.64	0.05529	0.22	0.06755	0.17	0.51495	0.28	0.64		423.8	4.8	421.4	0.7	421.8	1.2
	Z9	1.3	509	7.2	401.67	0.05506	0.15	0.06681	0.19	0.50721	0.24	0.8		414.7	3.3	416.9	0.8	416.6	1
	Z10	1.1	415	7.8	259.28	0.05513	0.21	0.06596	0.2	0.5014	0.3	0.7		417.7	4.7	411.8	0.8	412.7	1.2
JNE5 - Clach Leathad	Z27	2.8	524	0.9	6731.17	0.05519	0.14	0.06701	0.2	0.50991	0.24	0.8		419.8	3.2	418.1	0.8	418.4	1
	Z28	0.6	1025	1.3	2061.83	0.05521	0.09	0.0669	0.17	0.50924	0.19	0.89		420.6	1.9	417.5	0.7	417.9	0.8
	Z29	1.7	309	0.7	3097.45	0.05518	0.13	0.06683	0.2	0.50846	0.24	0.84		419.5	2.9	417.1	0.8	417.4	1
	Z30	3.3	313	1.1	4102.95	0.05513	0.07	0.0671	0.16	0.51011	0.18	0.93		417.7	1.5	418.7	0.7	418.5	0.8
	Z31	3	245	1.9	1630.51	0.05519	0.08	0.06686	0.17	0.50873	0.18	0.91		419.8	1.7	417.2	0.7	417.6	0.8
JNE8 - Cruchan	Z33	8.9	761	66.4	361.65	0.05497	0.57	0.06632	0.18	0.50268	0.62	0.39		411.2	12.7	413.9	0.7	413.5	2.6
	Z34	4	603	1.7	6725	0.05512	0.22	0.06447	0.16	0.48991	0.27	0.61		417	4.8	402.7	0.6	404.9	1.1
	Z35	8	550	4.4	4045.31	0.05508	0.12	0.06458	0.22	0.49048	0.22	0.88		415.7	2.7	403.4	0.9	405.2	0.9
	Z36	7	291	2.8	3018.55	0.05506	0.07	0.06648	0.06	0.50469	0.18	0.92		414.7	1.5	414.9	0.2	414.9	0.7
	Z37	6.3	468	1.8	7028.43	0.0551	0.06	0.06644	0.16	0.50481	0.17	0.94		416.4	1.3	414.7	0.7	414.9	0.7
	Z38	10.6	3	21.5	4097.55	0.05508	0.07	0.06634	0.16	0.50383	0.18	0.93		415.7	1.5	414	0.7	414.3	0.7
	Z4	1.4	254	0.4	3439.2	0.05507	0.12	0.0637	0.16	0.48181	0.18	0.9		414.8	2.8	398.5	0.6	399.4	0.7
	Z5	2.5	489	2.2	2378.29	0.0554	0.16	0.066	0.17	0.50282	0.35	0.94		428.4	3.6	412.4	0.7	413.3	1.5
JNGC87 - Starav	Z10	7.1	350	3.3	14055.72	0.055	0.75	0.06534	0.14	0.49554	0.81	0.5		412.3	16.8	408	0.5	408.7	2.7
	Z41	8.4	452	3.8	12397.28	0.05496	0.5	0.06534	0.16	0.49515	0.55	0.48		410.7	11	408	0.6	408.4	1.9
	Z42	4.5	175	0.9	3819.94	0.05509	0.1	0.06531	0.19	0.49427	0.34	0.6		415.7	2.3	407.8	0.8	407.8	1.4
All errors are 2? (per cent for ratios, absolute for ages)
‡ Total common Pb in analysis, corrected for spike and fractionation (0.09%/amu)
† Measured ratio, corrected for spike and Pb fractionation
* Corrected for blank Pb, U and common Pb (Stacey and Kramers 1975)
